# Supplementary material
Source: publisher site journal article supplement (https://www.spandidos-publications.com/3282/downloadSupplementary)

Figure S1. DC treatment does not increase ROS production in NPC cell lines NPC-039 and NPC-BM. (A) Reactive oxygen species (ROS) was analyzed after treatment with DC (0, 25, 50, and 100  $\mu$ M) by using the Muse Cell Analyzer. NPC, nasopharyngeal carcinoma; DC, dehydrocrenatidine.

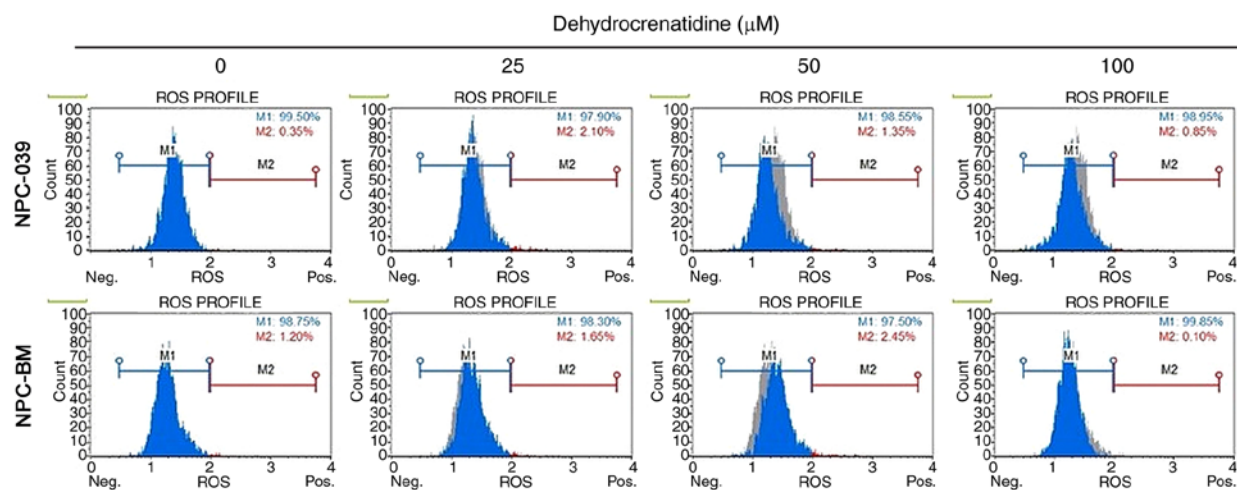

Supplement: Supplementary file 1 [file downloadSupplementary]
